# Supplementary material
Source: PubMed Central journal article supplement (PMC6854654)

## Supporting Information

### Controlling healing and toughness in polyurethanes by branch-mediated tube dilation

Vincenzo Montano<sup>1\*</sup>, Max M. B. Wempe<sup>1</sup>, Sam M. H. Does<sup>1</sup>, Johan C. Bijleveld<sup>1</sup>, Sybrand van der Zwaag<sup>1</sup> and Santiago J. Garcia<sup>1</sup>

<sup>1</sup>Novel Aerospace Materials group, Faculty of Aerospace Engineering, Delft University of Technology, Kluyverweg 1, 2629 HS, Delft, The Netherlands

\*Contact e-mail: [v.montano@tudelft.nl](mailto:v.montano@tudelft.nl)

List of figures and tables:

|                  |                                                                                                                                                                                  |
|------------------|----------------------------------------------------------------------------------------------------------------------------------------------------------------------------------|
| <b>Figure S1</b> | H-NMR and C-NMR synthesized diols                                                                                                                                                |
| <b>Figure S2</b> | H-NMR and C-NMR synthesized brush polyurethanes                                                                                                                                  |
| <b>Figure S3</b> | XRD spectra HDI_BDO and HDI_C18DA                                                                                                                                                |
| <b>Table S-I</b> | Young's modulus ( $E$ ), yield stress ( $\sigma_y$ ), ultimate tensile strength ( $\sigma_{UTS}$ ) and strain at break ( $\varepsilon_{break}$ ) of selected brush polyurethanes |
| <b>Figure S4</b> | Frequency master curves of HDI_C4DA and HDI_C7DA shifted at $T_0 = 20$ °C                                                                                                        |
| <b>Figure S5</b> | Frequency master curve of low molecular weight HDI_C8DA                                                                                                                          |
| <b>Figure S6</b> | Temperature sweep analyses of amorphous and semicrystalline brush polyurethanes (HDI_C4DA, HDI_C7DA, HDI_C8DA, HDI_C9DA, HDI_C12DA).                                             |
| <b>Figure S7</b> | XRD spectra of HDI_C8DA at different annealing times.                                                                                                                            |
| <b>Figure S8</b> | Mechanical tensile test of HDI_C8DA after healing for 7 days at 21 °C.                                                                                                           |

## **1. Synthesis of malonate molecules**

### **1.1. Diethyl 2,2-diheptylmalonate (C7DE)**

The synthesis was performed using the same procedure described in Section 2.1. of the main manuscript. The following materials and quantities were used: 400 mL of anhydrous THF, 23.20 g (0.15 mol) of diethyl malonate, 79.80 g (0.45 mol) of 1-bromoheptane and 18.20 g of sodium hydride (0.46 mol, 60 wt% in mineral oil) . The crude product (72.40 g) was used without further purification.

### **1.2. Diethyl 2,2-dioctylmalonate (C8DE)**

The synthesis was performed using the same procedure described in Section 2.1. of the main manuscript. The following materials and quantities were used: 400 mL of anhydrous THF, 16.04 g (0.10 mol) of diethyl malonate, 57.93 g (0.30 mol) of 1-bromooctane and 12.0 g of sodium hydride (0.30 mol, 60 wt% in mineral oil). The crude product (53.42 g) was used without further purification.

### **1.3. Diethyl 2,2-dinonylmalonate (C9DE)**

The synthesis was performed using the same procedure described in Section 2.1. of the main manuscript. The following materials and quantities were used: 400 mL of anhydrous THF, 16.88 g (0.11 mol) of diethyl malonate, 61.79 g (0.30 mol) of 1-bromononane and 12.0 g of sodium hydride (0.30 mol, 60 wt% in mineral oil). The crude product (45.04 g) was used without further purification.

### **1.4. Diethyl 2,2-didodecylmalonate (C12DE)**

The synthesis was performed using the same procedure described in Section 2.1. of the main manuscript. The following materials and quantities were used: 400 mL of anhydrous THF, 12.87 g (0.08 mol) of diethyl malonate, 62.28 g (0.25 mol) of 1-bromododecane and 9.86 g of

sodium hydride (0.25 mol, 60 wt% in mineral oil). The crude product (50.4 g) was used without further purification.

### **1.5. Diethyl 2,2-dioctadecylmalonate (C18DE)**

The synthesis was performed using the same procedure described in Section 2.1. of the main manuscript. The following materials and quantities were used: 400 mL of anhydrous THF, 9.62 g (0.06 mol) of diethyl malonate, 62.46 g (0.19 mol) of 1-bromononane and 7.42 g of sodium hydride (0.19 mol, 60 wt% in mineral oil). The crude product (45.04 g) was used without further purification.

## **2. Syntheses of diol monomers**

### **2.1. 2,2-Dioctylpropane-1,3-diol (C7DA)**

The synthesis was performed following the same procedure described in Section 2.2. of the main manuscript. The following materials and quantities were used: 400 mL of anhydrous THF, 49.50 g of crude C8DE and 16.30 g (0.26 mol) lithium aluminium hydride. Preliminary purification was carried out by column chromatography using 450 g of silica and pure hexane. The product final product was eluted by increasing the polarity of the eluent by mixing hexane and ethyl acetate (hexane:ethyl acetate, 7:3(v/v)). Yield = 74%.

$^1\text{H-NMR}$  ( $\text{CDCl}_3$ , 400 MHz)  $\delta$ : 3.50 (s, 4H); 3.20-3.13 (m, 2H); 1.31-1.15 (m, 24H), 0.89-0.82 (t, 6H).  $^{13}\text{C-NMR}$  ( $\text{CDCl}_3$ , 400 MHz)  $\delta$ : 69.06; 40.89; 31.87; 30.67; 30.53; 29.25; 22.80; 14.05.

### **2.2. 2,2-Dioctylpropane-1,3-diol (C8DA)**

The synthesis was performed following the same procedure described in Section 2.2. of the main manuscript. The following materials and quantities were used: 400 mL of anhydrous THF, 53.13 g of crude C8DE and 9.93 g (0.26 mol) lithium aluminium hydride. Preliminary purification was carried out by column chromatography using 450 g of silica and pure hexane.

The product final product was eluted by increasing the polarity of the eluent by mixing hexane and ethyl acetate (hexane:ethyl acetate, 7:3(v/v)). Yield = 84%.

$^1\text{H-NMR}$  ( $\text{CDCl}_3$ , 400 MHz)  $\delta$ : 3.55 (s, 4H); 2.28 (s, 2H); 1.25 (m, 28H), 0.86 (t, 6H).  $^{13}\text{C-NMR}$  ( $\text{CDCl}_3$ , 400 MHz)  $\delta$ : 69.41; 40.95; 31.86; 30.74; 30.65; 29.53; 22.82; 14.07.

### **2.3. 2,2-Dinonylpropane-1,3-diol (C9DA)**

The synthesis was performed following the same procedure described in Section 2.2. of the main manuscript. The following materials and quantities were used: 400 mL of anhydrous THF, 39.10 g of crude C9DE and 11.96 g (0.32 mol) lithium aluminium hydride. Preliminary purification was carried out by column chromatography using 450 g of silica and pure hexane. The product final product was eluted by increasing the polarity of the eluent by mixing hexane and ethyl acetate (hexane:ethyl acetate, 9:1(v/v)). Yield = 75%.

$^1\text{H-NMR}$  ( $\text{CDCl}_3$ , 400 MHz)  $\delta$ : 3.55 (s, 4H); 2.25 (s, 2H); 1.25 (m, 32H), 0.87 (t, 6H).  $^{13}\text{C-NMR}$  ( $\text{CDCl}_3$ , 400 MHz)  $\delta$ : 69.48; 40.98; 31.87; 29.60; 29.30; 22.83; 14.07.

### **2.4. 2,2-Didodecylpropane-1,3-diol (C12DA)**

The synthesis was performed following the same procedure described in Section 2.2. of the main manuscript. The following materials and quantities were used: 400 mL of anhydrous THF, 43.67 g of crude C12DE and 11.84 g (0.32 mol) lithium aluminium hydride. Preliminary purification was carried out by column chromatography using 450 g of silica and pure hexane. The product final product was eluted by increasing the polarity of the eluent by mixing hexane and ethyl acetate (hexane:ethyl acetate, 9:1(v/v)). Yield = 77%.

$^1\text{H-NMR}$  ( $\text{CDCl}_3$ , 400 MHz)  $\delta$ : 3.53 (s, 4H); 2.70 (s, 2H); 1.24 (m, 44H), 0.86 (t, 6H).  $^{13}\text{C-NMR}$  ( $\text{CDCl}_3$ , 400 MHz)  $\delta$ : 69.33; 40.93; 31.90; 29.68; 29.67; 22.82; 14.08.

### **2.5. 2,2-Dioctadecylpropane-1,3-diol (C18DA)**

The synthesis was performed following the same procedure described in Section 2.2. of the main manuscript. The following materials and quantities were used: 400 mL of anhydrous THF, 47.77 g of crude C18DE and 11.62 g (0.31 mol) lithium aluminium hydride. Preliminary purification was carried out by column chromatography using 450 g of silica and pure hexane. The product final product was eluted by increasing the polarity of the eluent by mixing hexane and ethyl acetate (hexane:ethyl acetate, 9:1(v/v)). Yield = 91%.

$^1\text{H-NMR}$  ( $\text{CDCl}_3$ , 400 MHz)  $\delta$ : 3.56 (s, 4H); 2.08 (s, 2H); 1.24 (m, 68H), 0.87 (t, 6H).

### **3. Syntheses of brush polyurethanes**

#### **3.1. HDI\_C7DA**

The compound was synthesized following the procedure described in Section 2.3. The following materials and quantities were used in the synthesis: C7DA (6.0 g, 22.0 mmol) hexamethylene diisocyanate (3.70 g, 22.0 mmol), dibutyltin dilaurate (0.10 mL) and N,N-Dimethylformamide (36 mL). The compound appears as a transparent glassy polymer (yield = 9.7 g, 62%).

$^1\text{H-NMR}$  ( $\text{CDCl}_3$ , 400 MHz)  $\delta$ : 4.83 (s, 2H); 3.86 (m, 4H); 3.11 (m, 4H); 1.47 (m, 8H); 1.23 (m, 24H); 0.86 (t, 6H).

#### **3.2. HDI\_C8DA**

The compound was synthesized following the procedure described in Section 2.3. The following materials and quantities were used in the synthesis: C8DA (12.0 g, 40 mmol) hexamethylene diisocyanate (6.72 g, 40 mmol), dibutyltin dilaurate (0.15 mL) and N,N-Dimethylformamide (67 mL). The compound appears as a transparent glassy polymer (yield = 12.47 g, 65%).

$^1\text{H-NMR}$  ( $\text{CDCl}_3$ , 400 MHz)  $\delta$ : 5.99-4.80 (s, 2H); 3.92-3.81 (m, 4H); 3.16-3.03 (m, 4H); 1.52-1.40 (m, 4H); 1.34-1.14 (m, 32H); 0.89-0.81 (t, 6H).

### 3.3. HDI\_C12DA

The compound was synthesized following the procedure described in Section 2.3. The following materials and quantities were used in the synthesis: C12DA (3.71 g, 9.02 mmol) hexamethylene diisocyanate (1.51 g, 9.02 mmol), dibutyltin dilaurate (0.15 mL) and N,N-Dimethylformamide (10.5 mL). The compound appears as a transparent glassy polymer (yield = 3.32 g, 63%).

$^1\text{H-NMR}$  ( $\text{CDCl}_3$ , 400 MHz)  $\delta$ : 4.78 (s, 2H); 3.85 (m, 4H); 3.10 (m, 4H); 1.46 (m, 4H); 1.23 (m, 32H); 0.85 (t, 6H).

### 3.4. HDI\_C18DA

The compound was synthesized following the procedure described in Section 2.3. The following materials and quantities were used in the synthesis: C18DA (3.0 g, 5.17 mmol) hexamethylene diisocyanate (0.87 g, 5.17 mmol), dibutyltin dilaurate (0.12 mL) and N,N-Dimethylformamide (10.0 mL). The compound appears as a fine white powder (yield = 3.23 g, 83%).

$^1\text{H-NMR}$  ( $\text{CDCl}_3$ , 400 MHz)  $\delta$ : 4.76 (s, 2H); 3.86 (m, 4H); 3.12 (m, 4H); 1.72 (m, 4H); 1.24 (t, 72H); 0.86 (t, 6H).

Figure S1.  $^1\text{H}$ -NMR and  $^{12}\text{C}$ -NMR spectra of synthesized diols

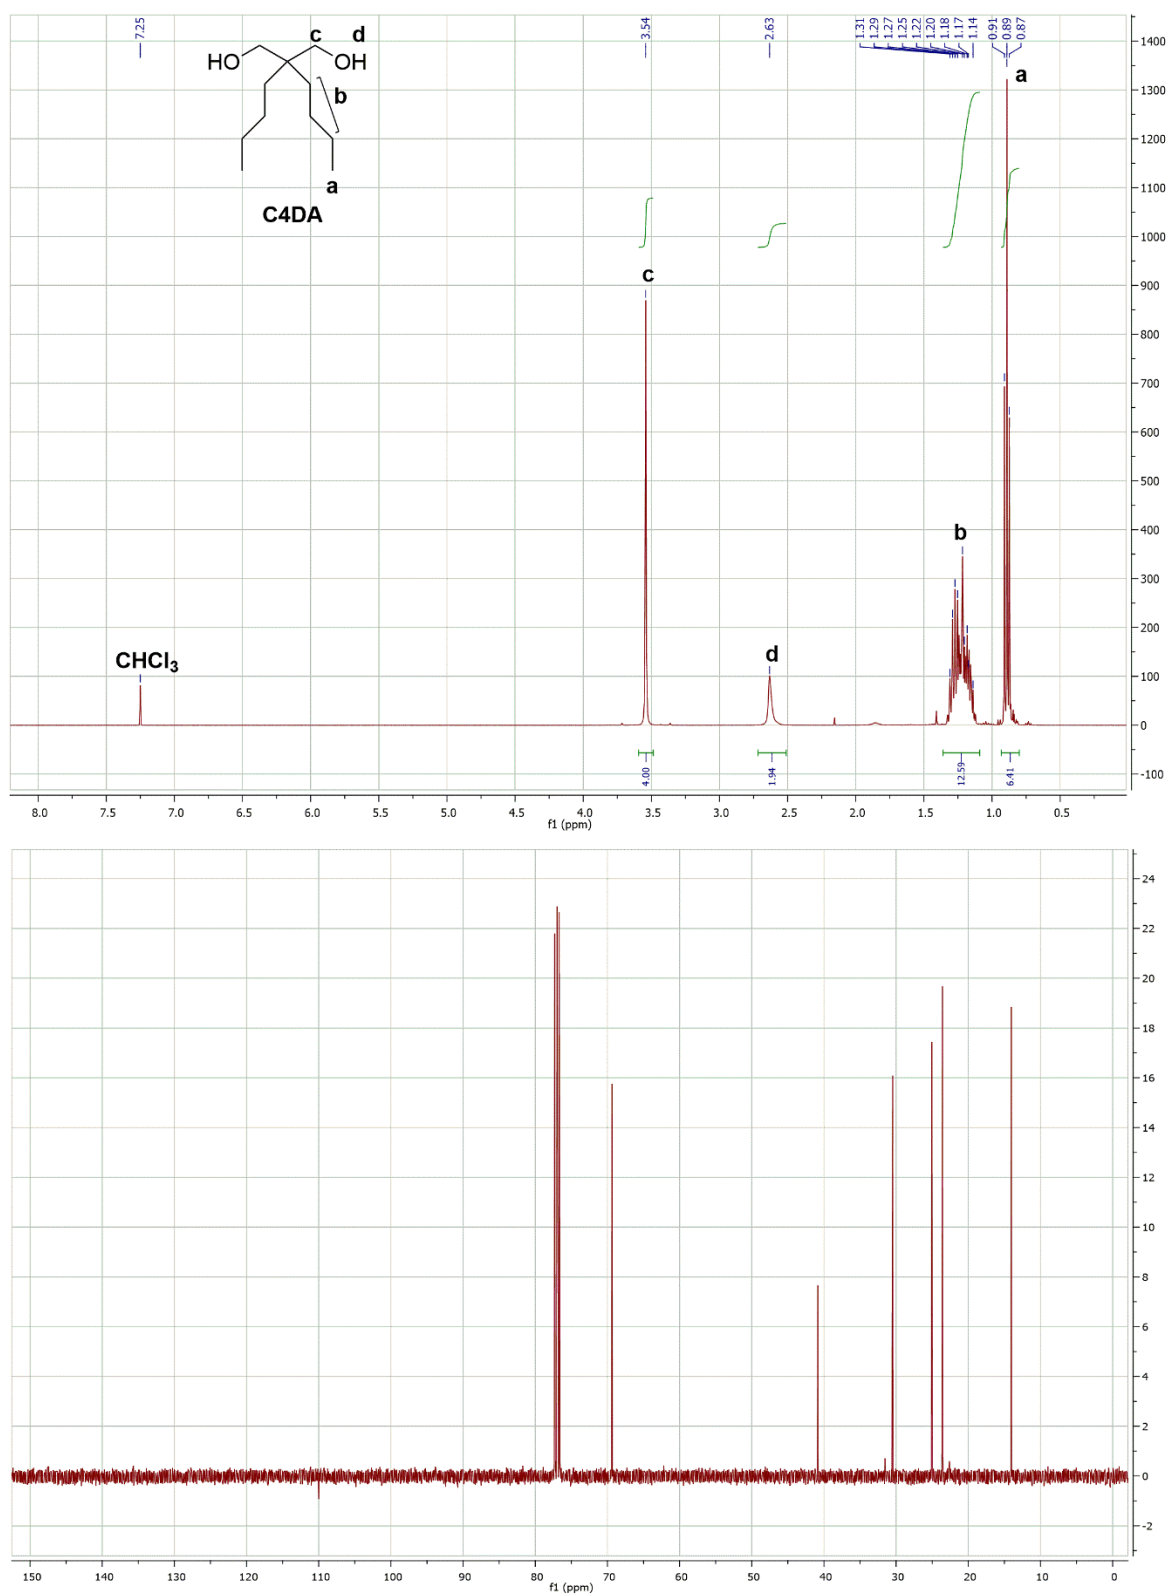

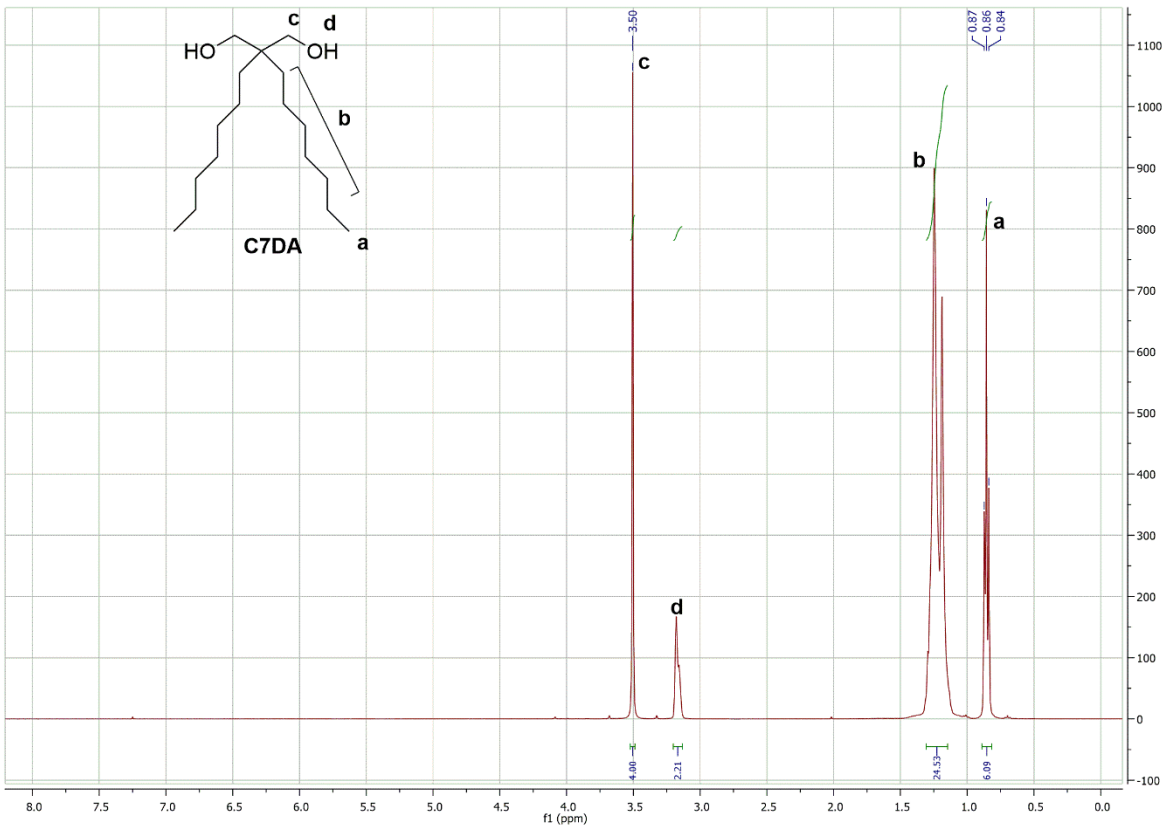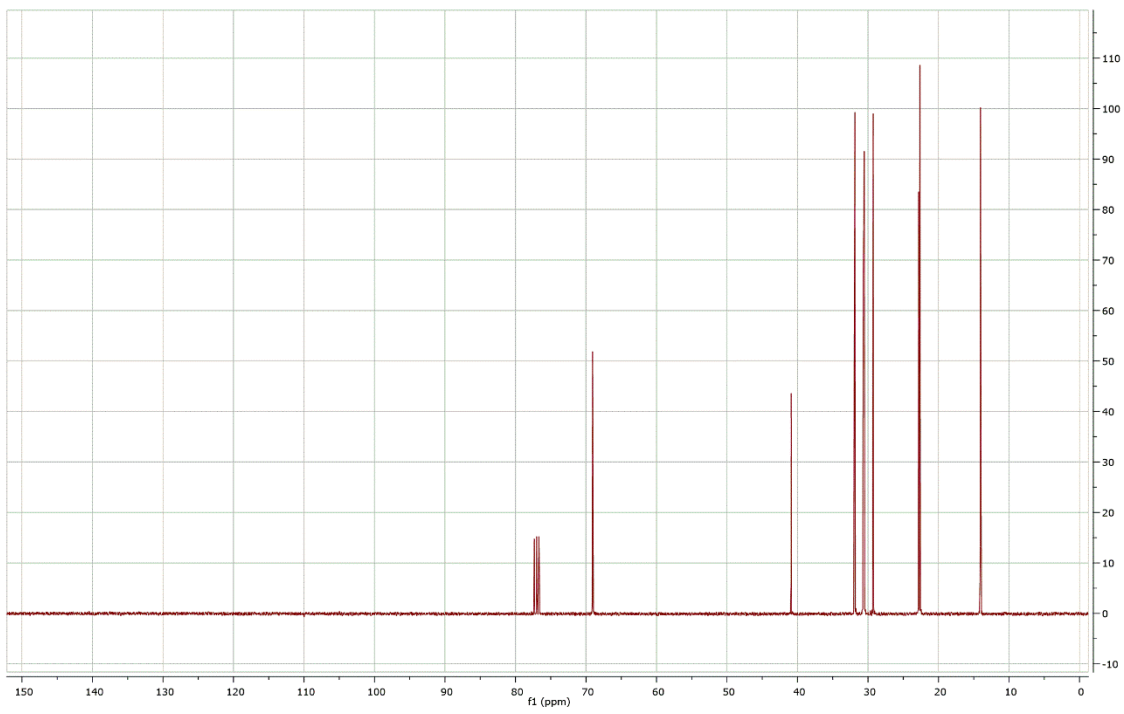



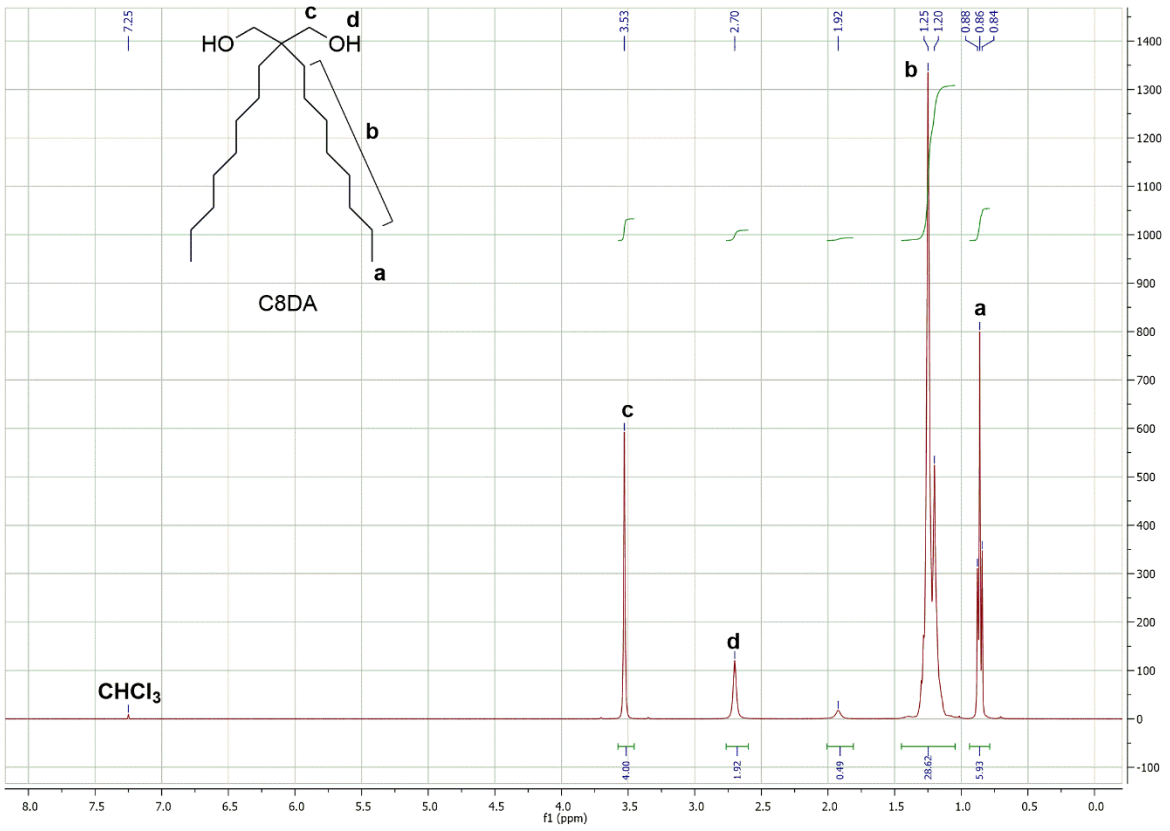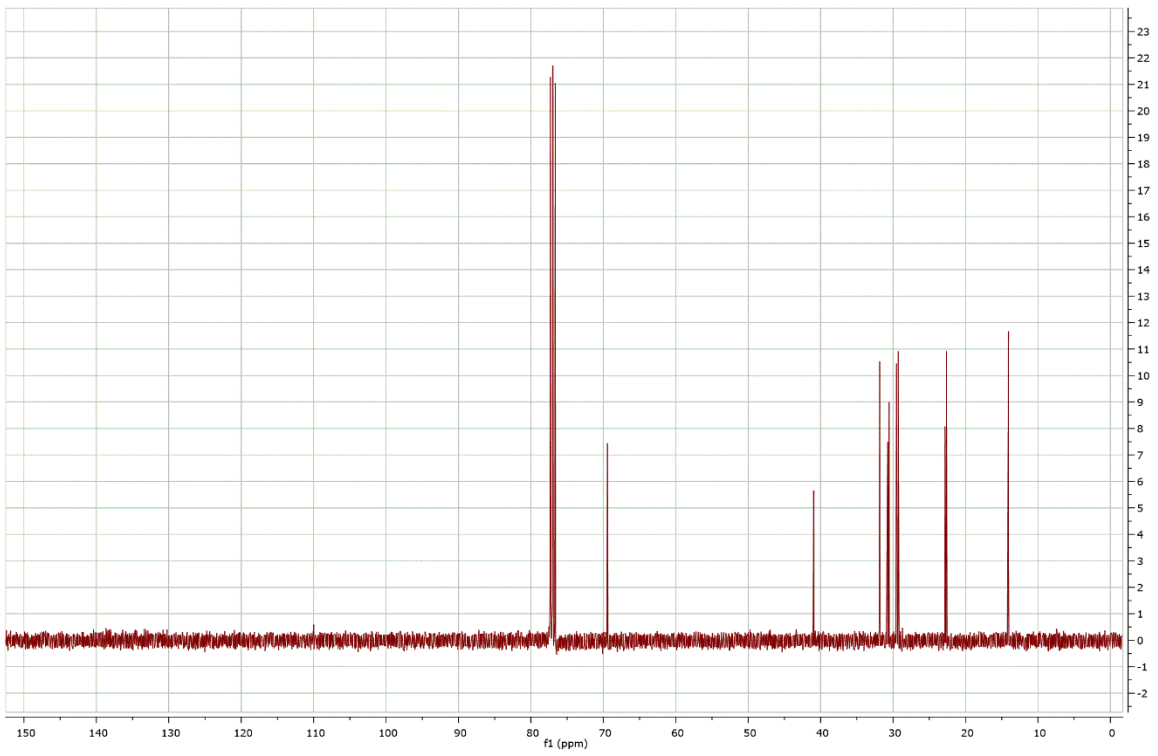

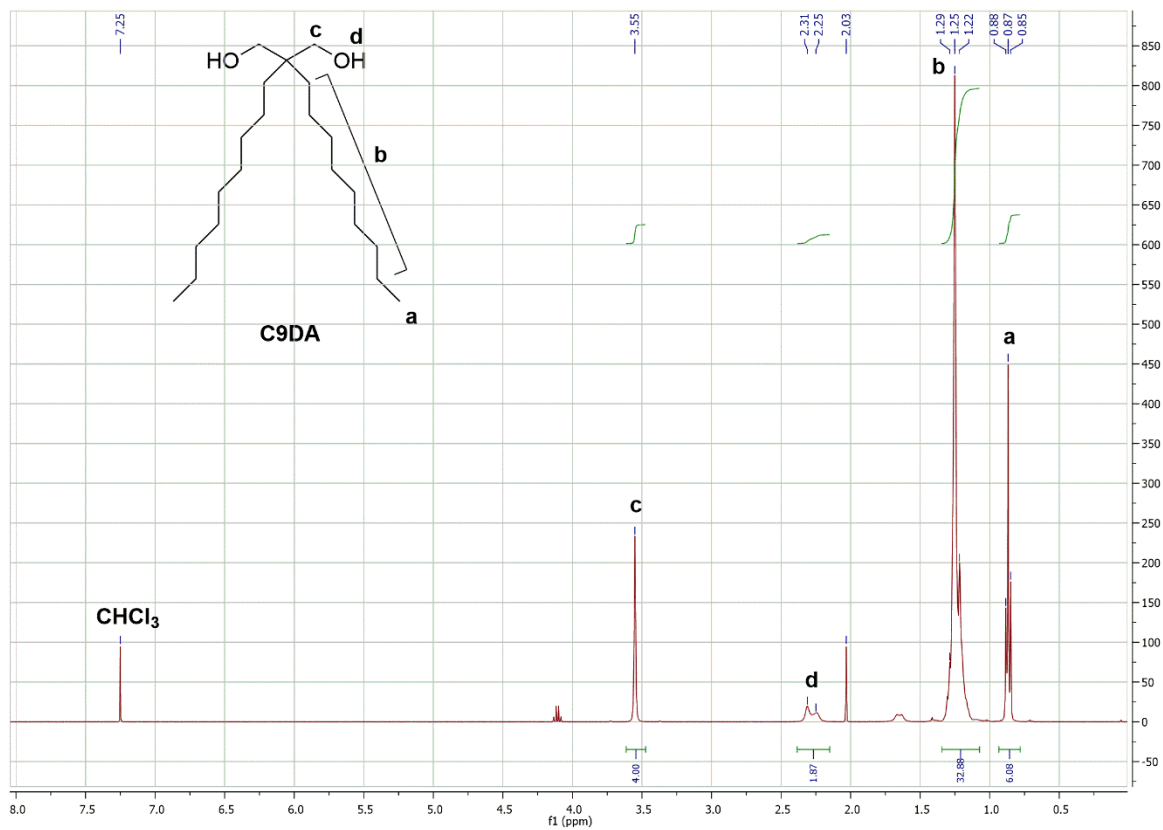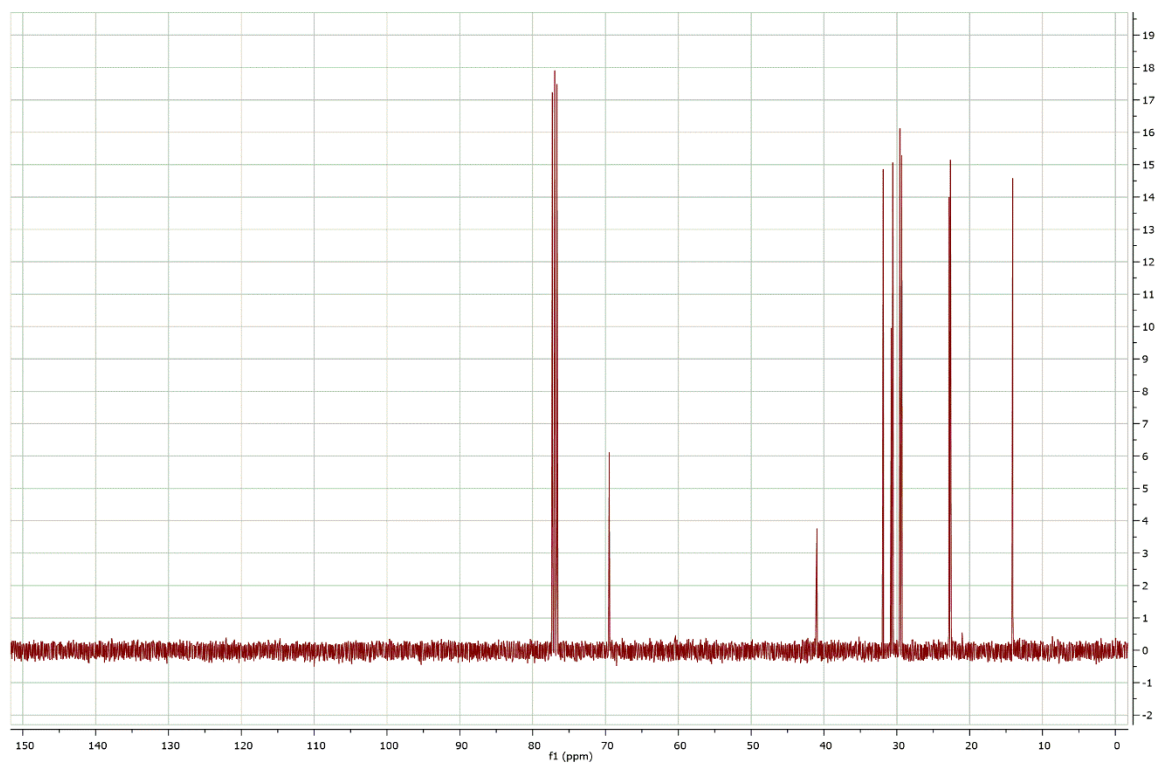

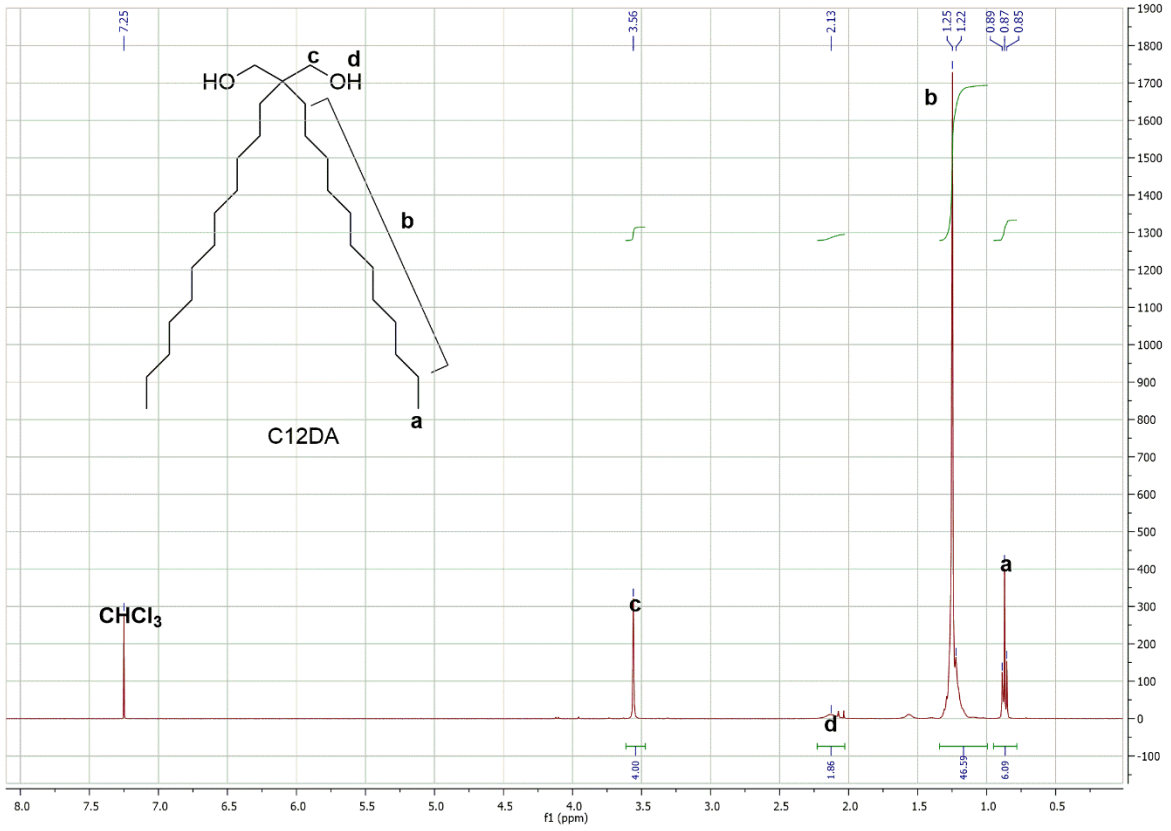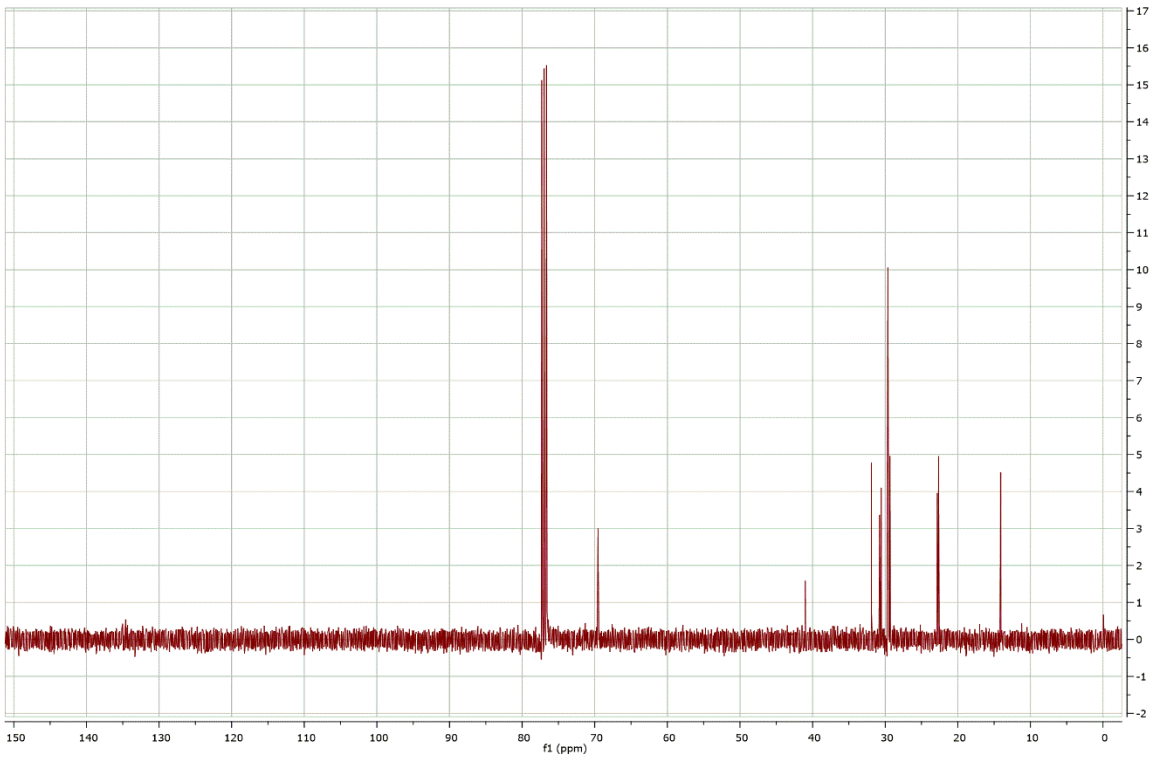

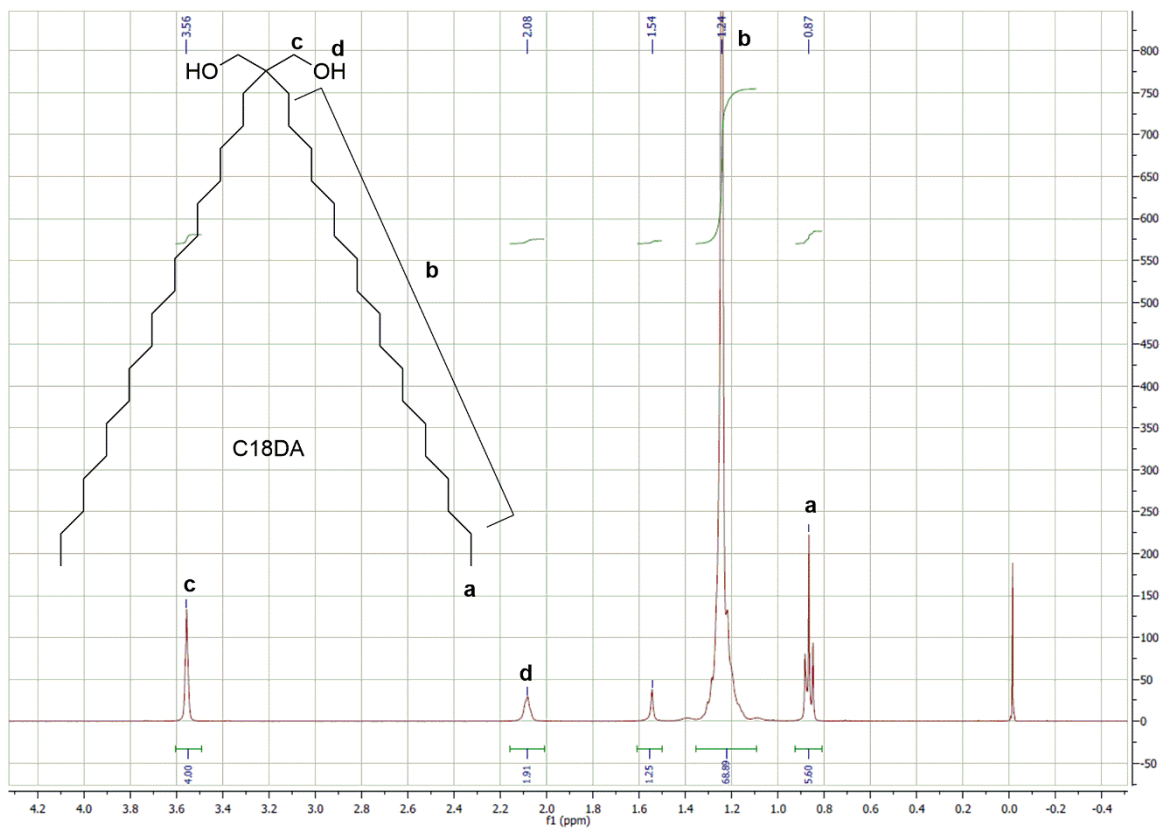

Figure S2.  $^1\text{H}$ -NMR and  $^{13}\text{C}$ -NMR of synthesized brush polyurethanes

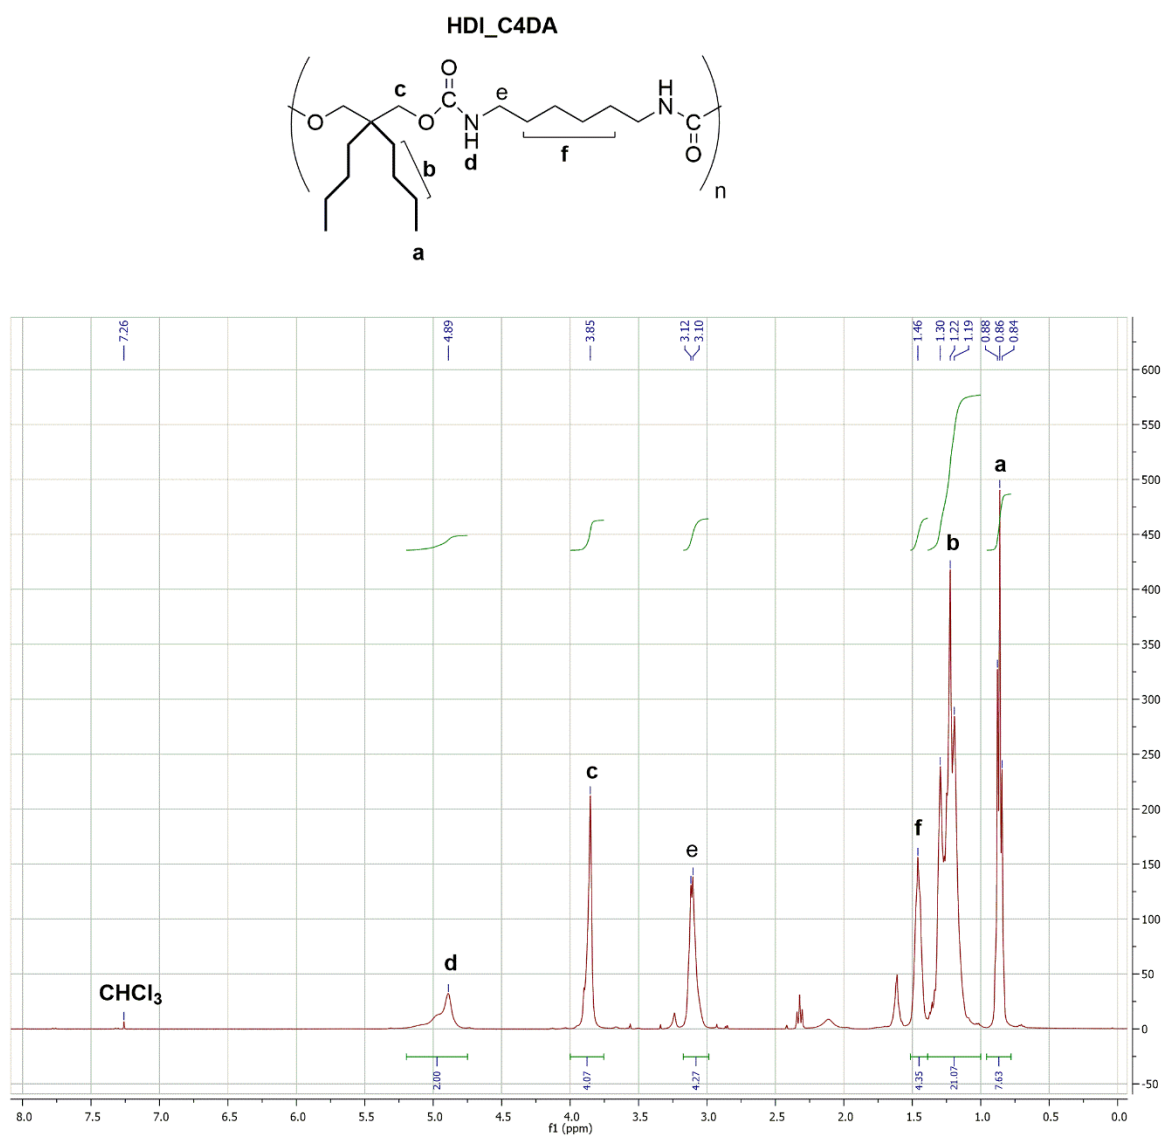

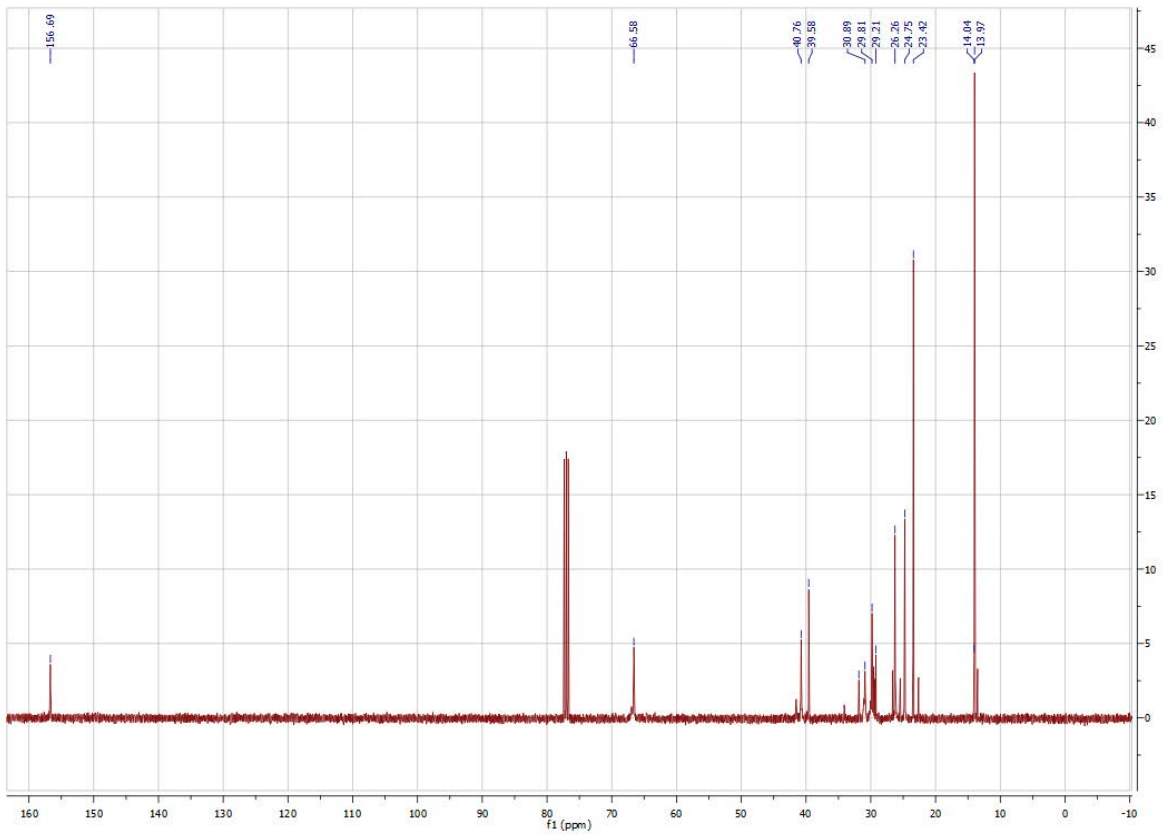

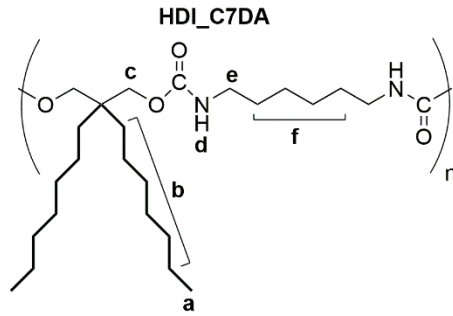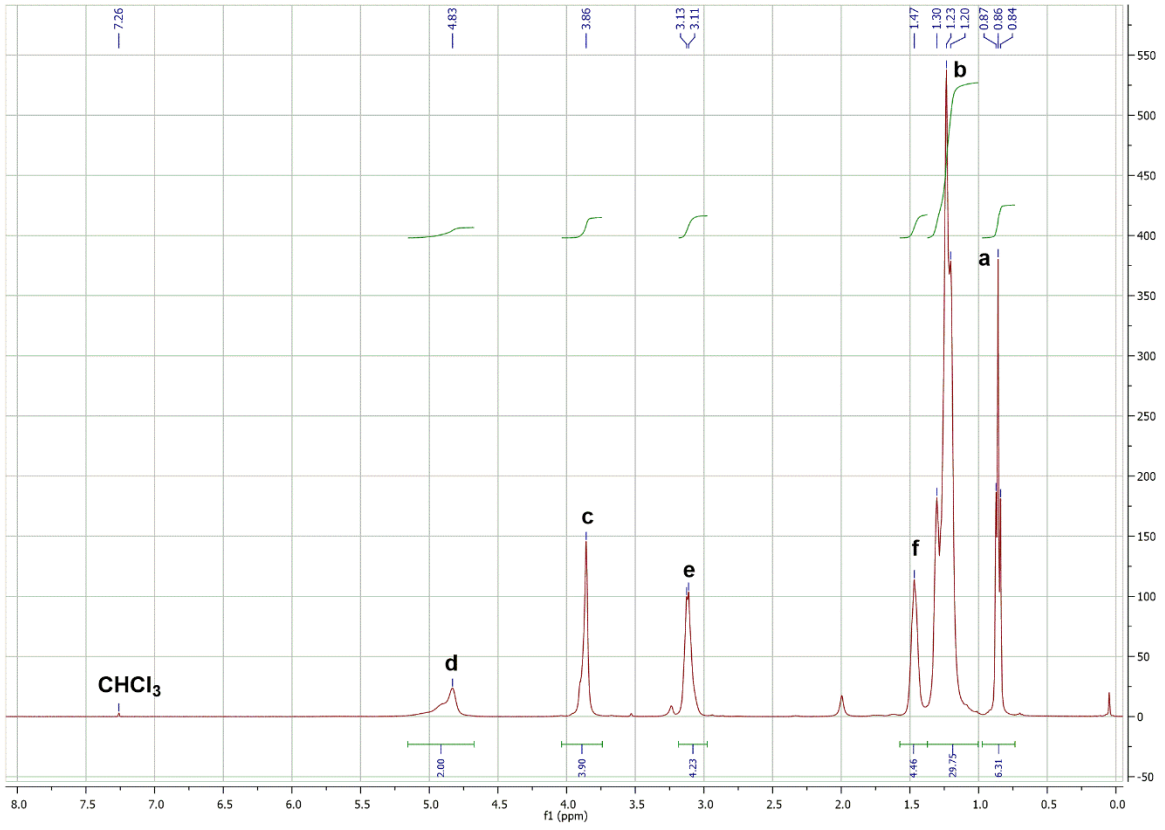

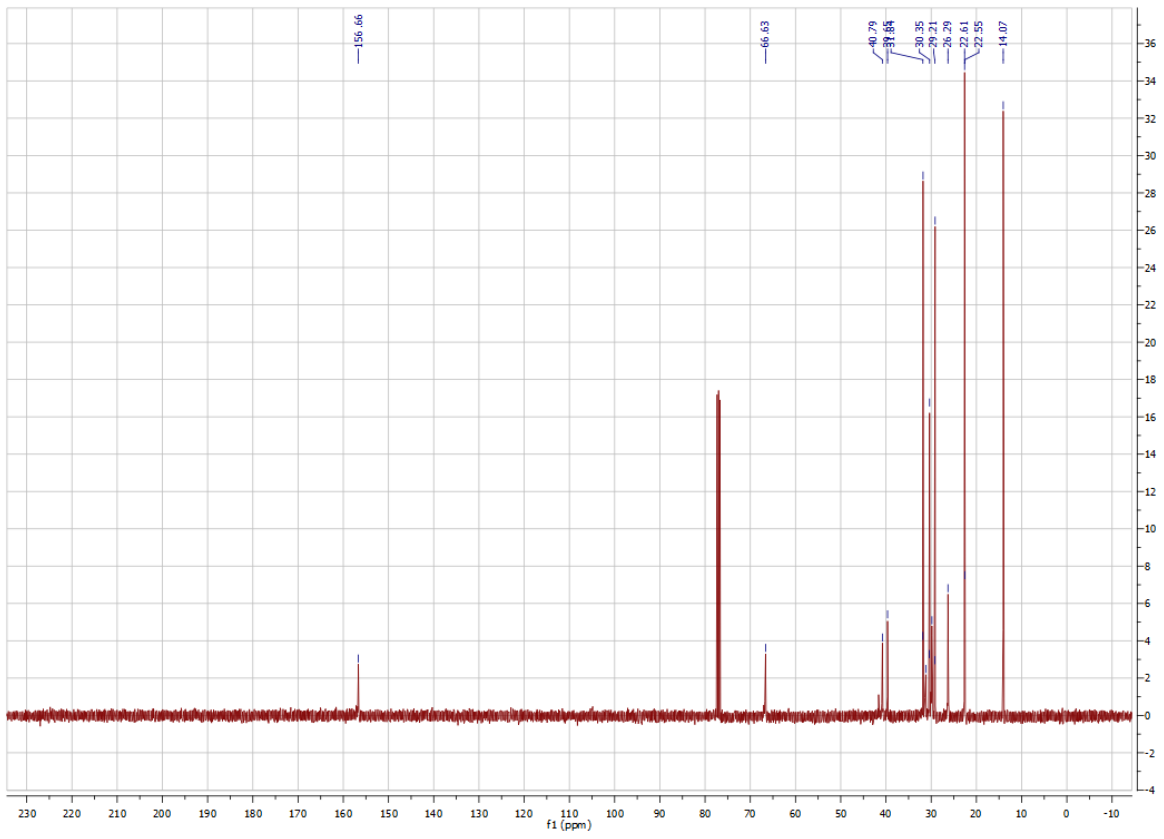



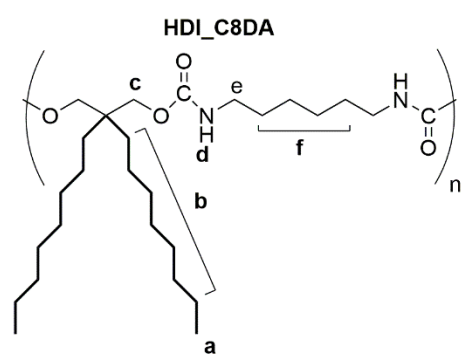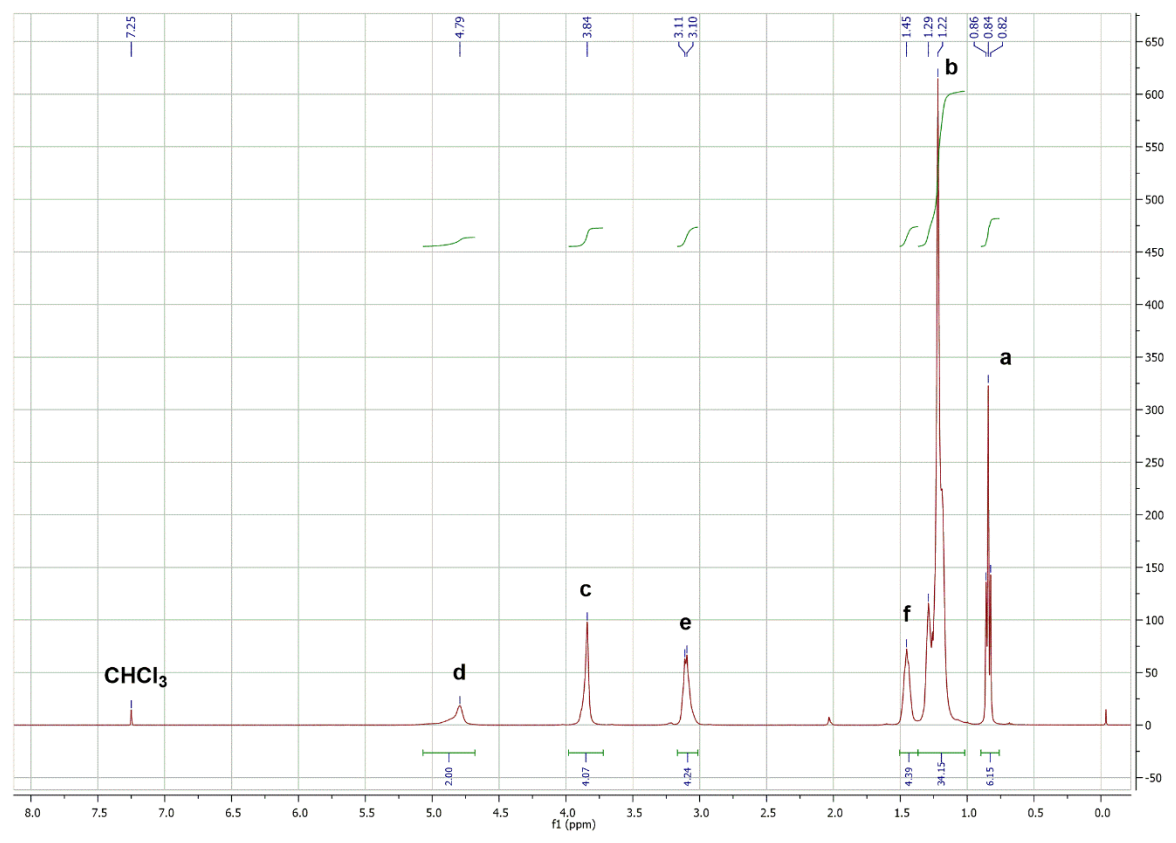

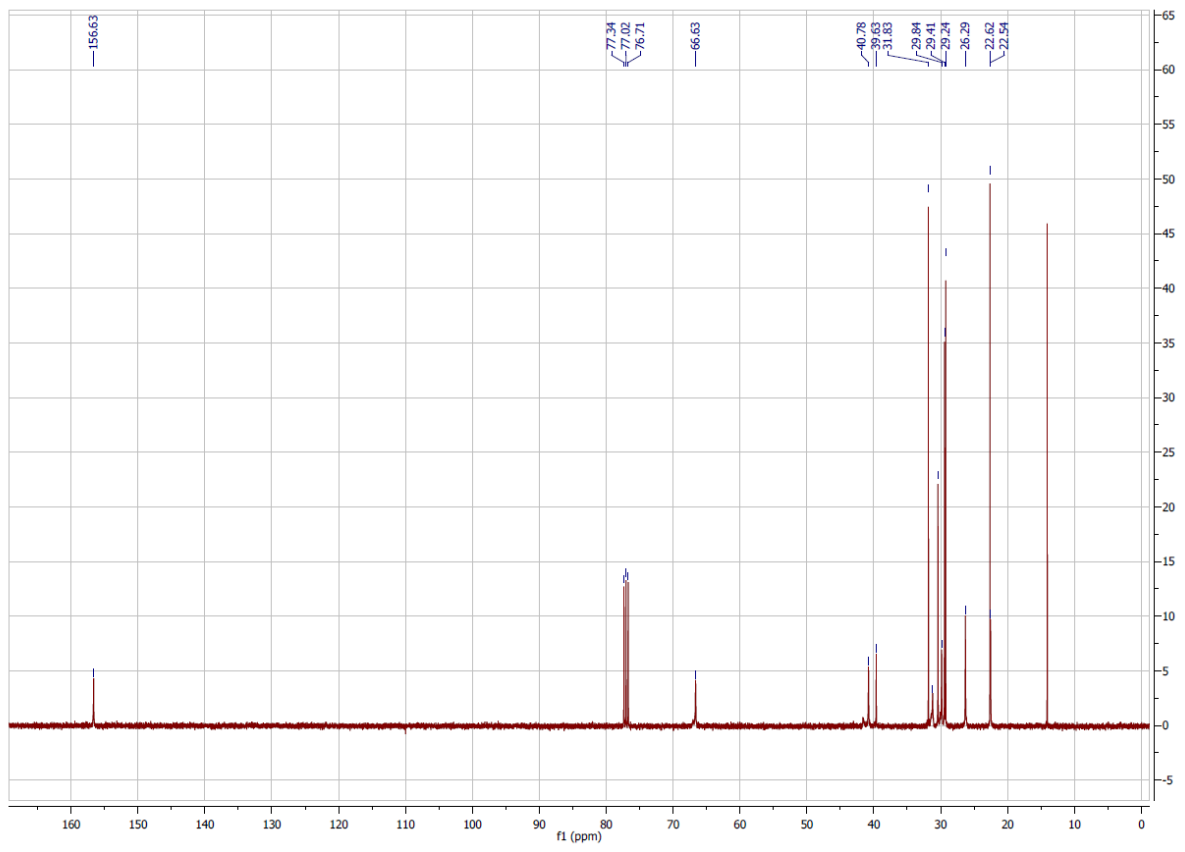

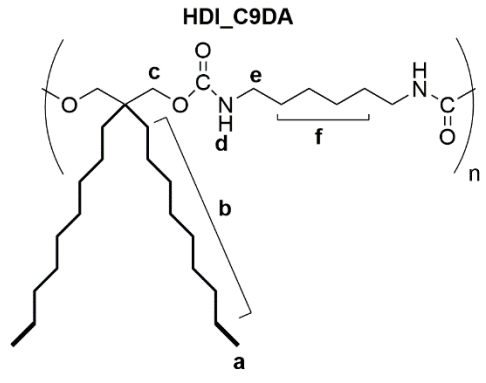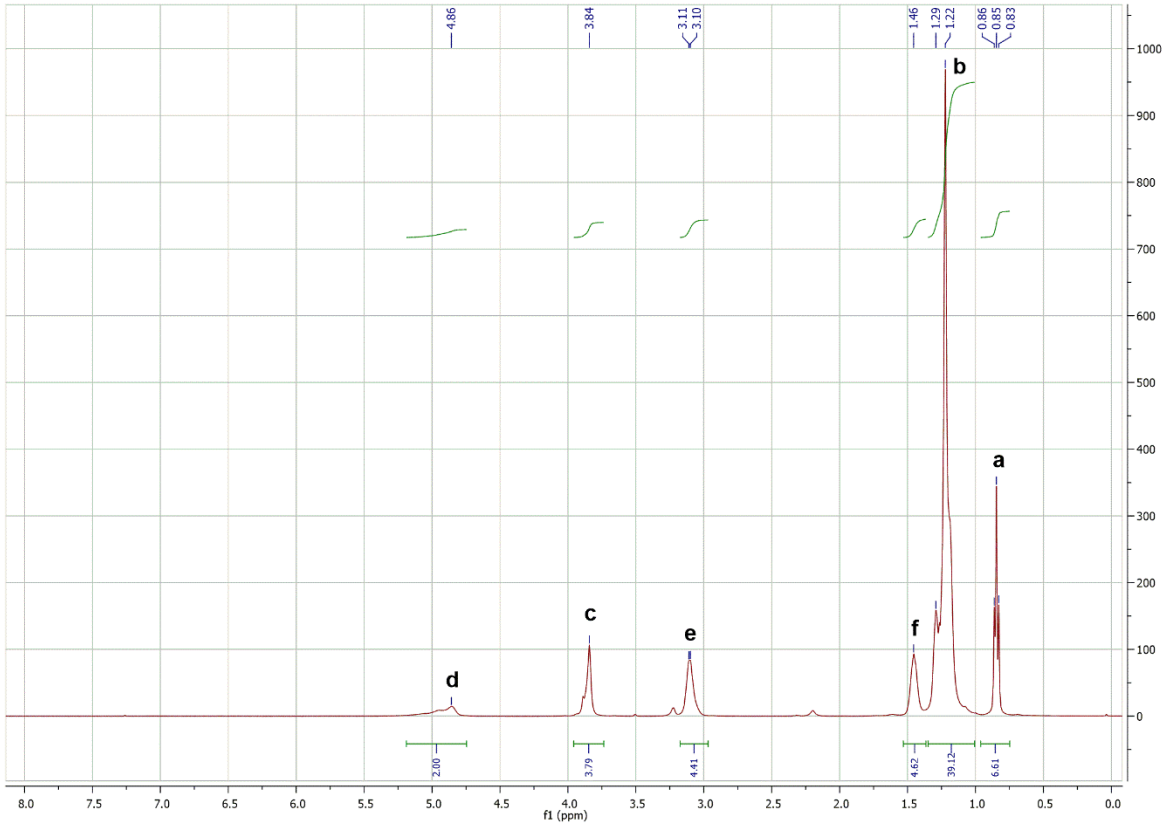

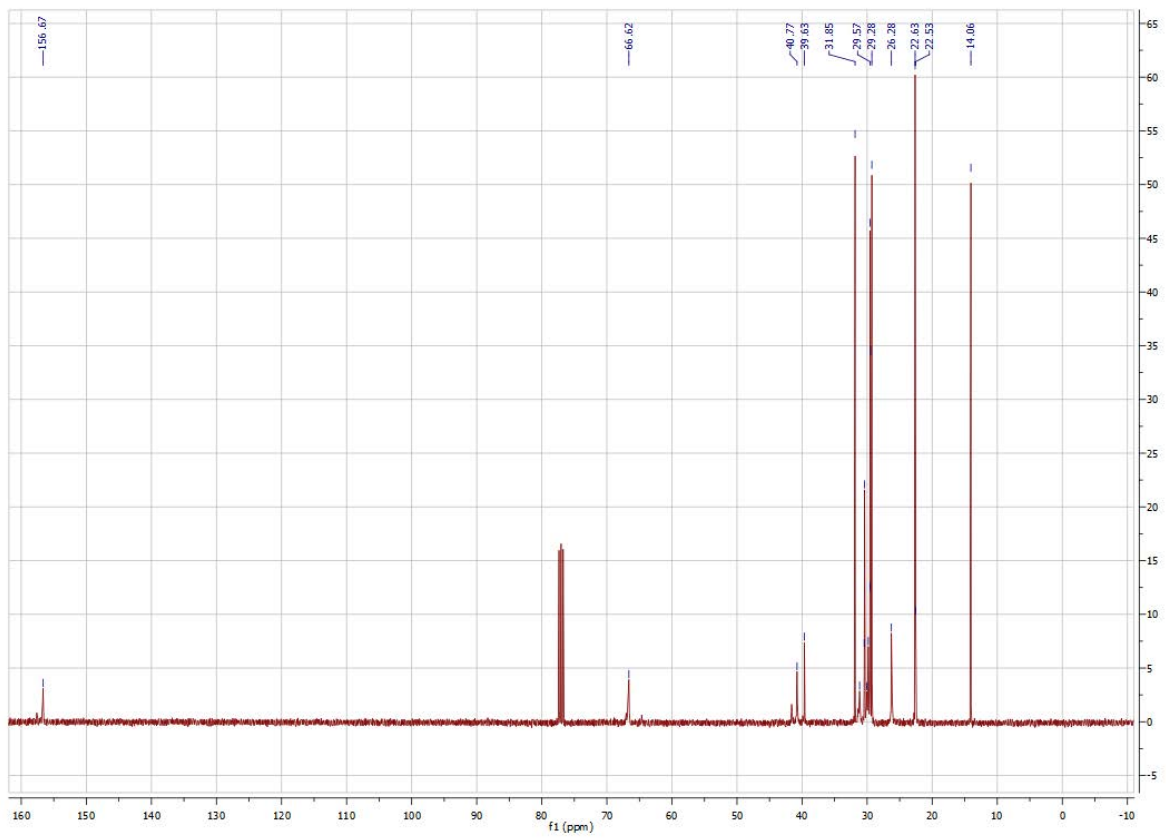

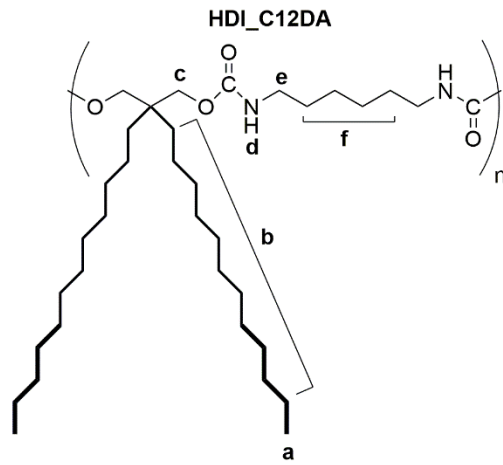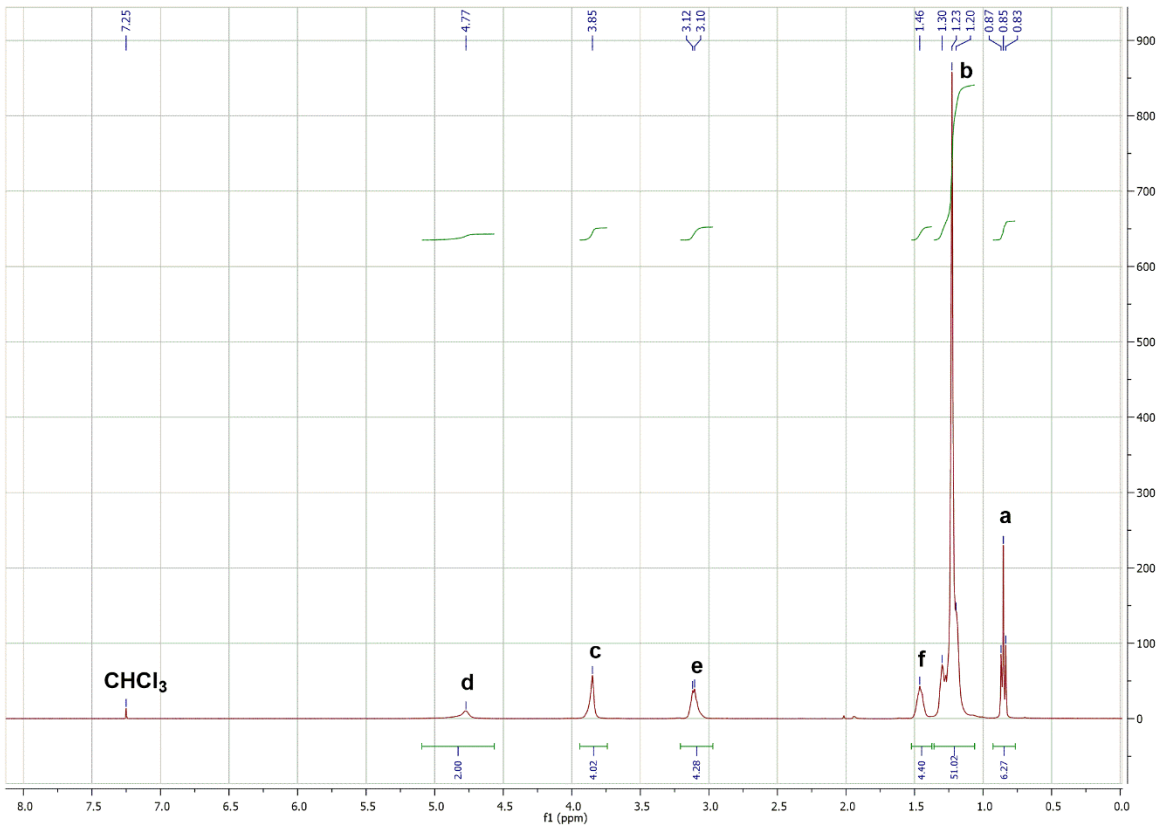

HDI\_C18DA

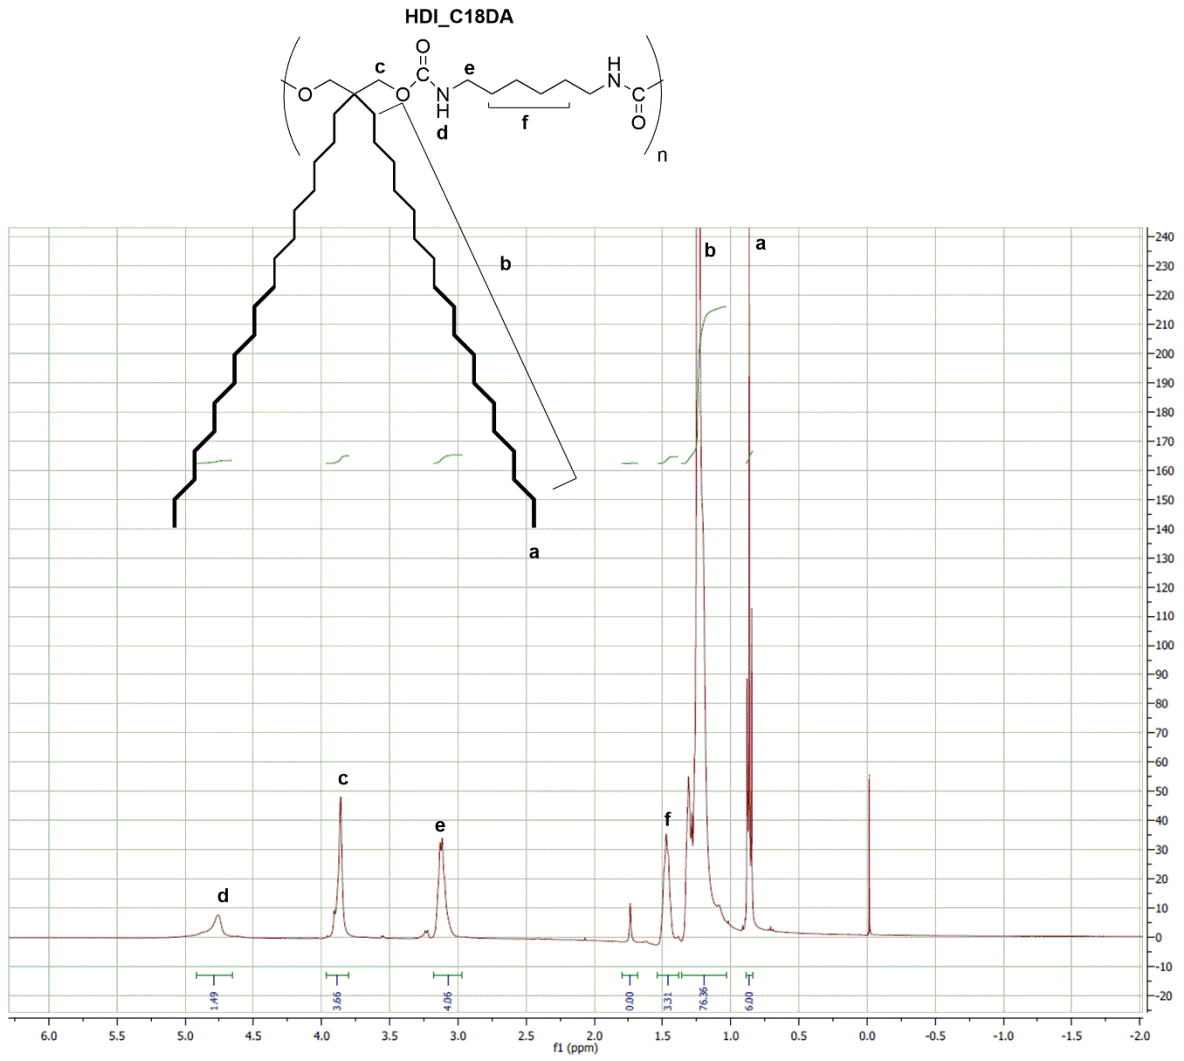

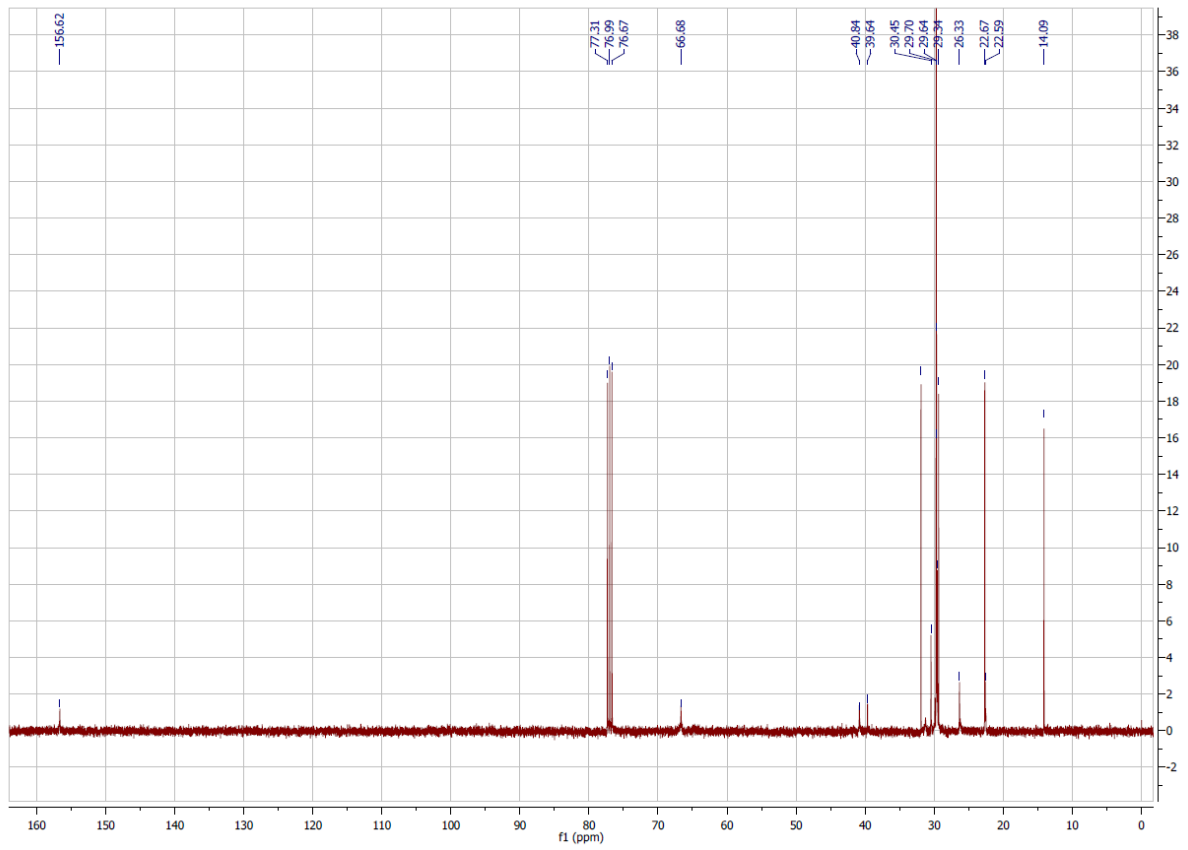

**Figure S3. XRD spectra of HDI\_BDO and HDI\_C18DA**

HDI\_BDO and HDI\_C18DA are semicrystalline polymers when cooling from the melt. XRD spectra support the formation of high crystalline phase.

**A.** XRD Spectrum of HDI\_BDO

**B.** XRD Spectrum of HDI\_C18DA

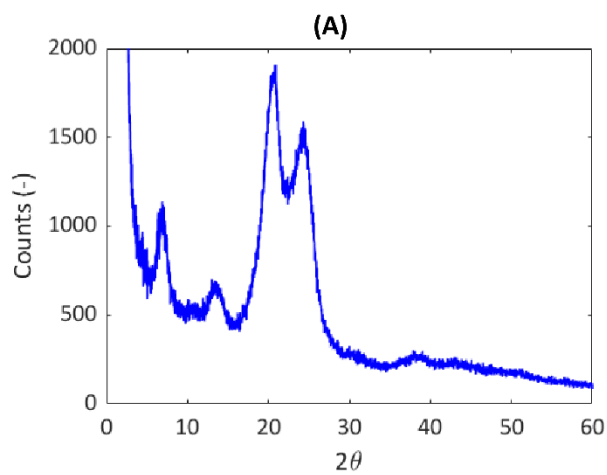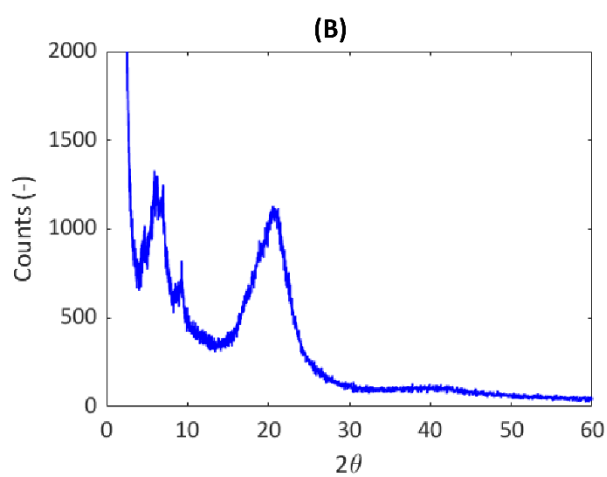



**Table S-I.** Young's modulus ( $E$ ), yield stress ( $\sigma_y$ ), ultimate tensile strength ( $\sigma_{UTS}$ ) and strain at break ( $\varepsilon_{break}$ ) of selected brush polyurethanes

| <b>Polymer</b> | <b><math>E</math><br/>(MPa)</b> | <b><math>\sigma_y</math><br/>(MPa)</b> | <b><math>\sigma_{UTS}</math><br/>(MPa)</b> | <b><math>\varepsilon_{break}</math><br/>(%)</b> |
|----------------|---------------------------------|----------------------------------------|--------------------------------------------|-------------------------------------------------|
| HDI_C4DA       | 150                             | 5.3                                    | 3.9                                        | 260                                             |
| HDI_C7DA       | 60                              | 1.5                                    | 10.5                                       | 660                                             |
| HDI_C8DA       | 34                              | 1.3                                    | 10.2                                       | 764                                             |
| HDI_C9DA       | 4                               | 0.2                                    | 0.6                                        | 862                                             |
| HDI_C12DA      | 68                              | 4.7                                    | 3.9                                        | 200                                             |

Figure S4. Frequency master-curves of HDI\_C4DA and HDI\_C7DA shifted at  $T_0 = 20\text{ }^\circ\text{C}$

A. HDI\_C4DA mastercurve

B. HDI\_C7DA mastercurve

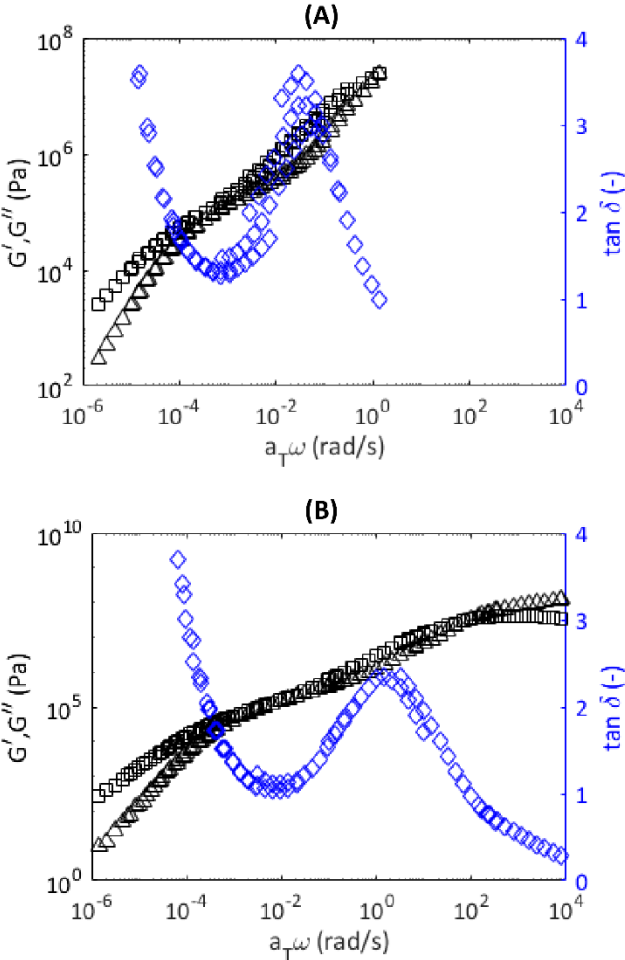

Figure S5. Frequency mastercurve of low molecular weight HDI\_C8DA

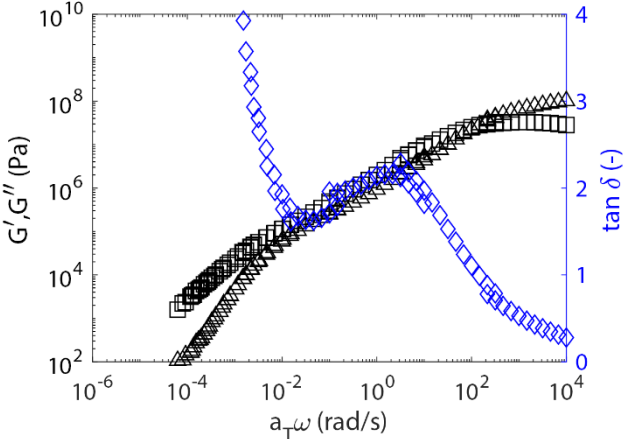

**Figure S6. Temperature sweep analyses of amorphous and semicrystalline brush**

**polyurethanes.**

**(A)** Temperature sweep analyses of HDI\_C4DA, HDI\_C7DA, HDI\_C8DA, HDI\_C9DA. **(B)** Effect of brush length on maximum damping temperature ( $T_{max\ tan\ \delta}$ ) and terminal relaxation temperature ( $T_{terminal}$ ). Note that increasing dangling chain length determines a shift to lower temperature of  $T_{max\ tan\ \delta}$  and  $T_{terminal}$ . **(C)** Effect of brush length on maximum absolute value of damping ( $\tan\ \delta_{max}$ ). Note that increasing brush length determines a decrease of mechanical damping. **(D)** Temperature sweep analyses of HDI\_C8DA, HDI\_C9DA, HDI\_12DA. Note that for HDI\_C9DA and HDI\_C12DA no clear restriction of dynamics was observed. For these polymers the change of slope in  $\tan\ \delta$  was attributed to a competitive crystallisation behaviour from side chain stacking.

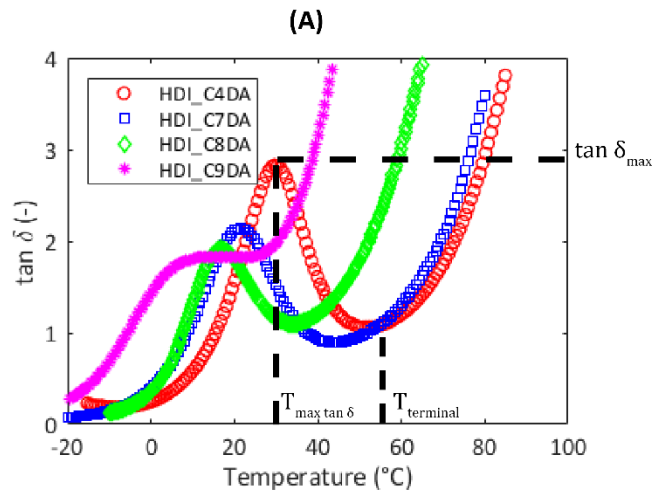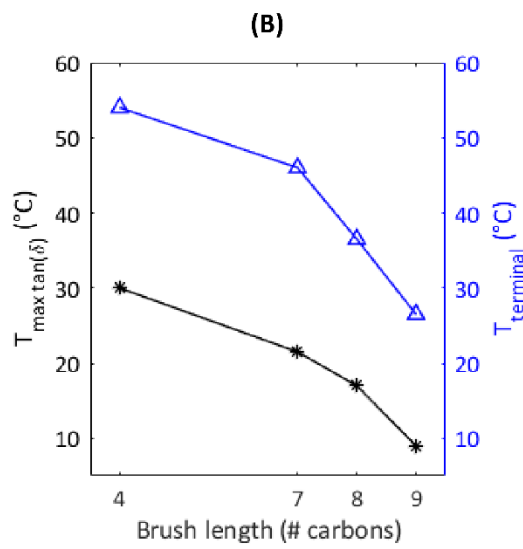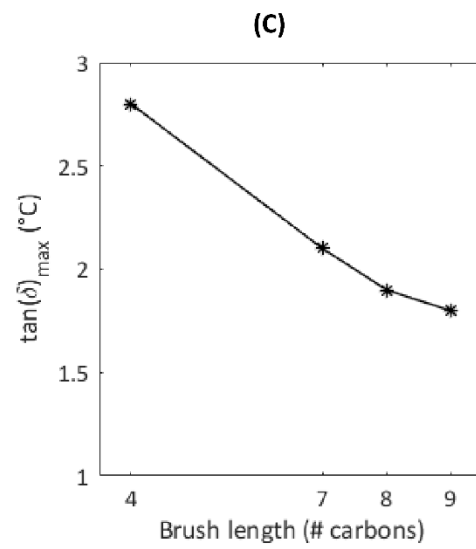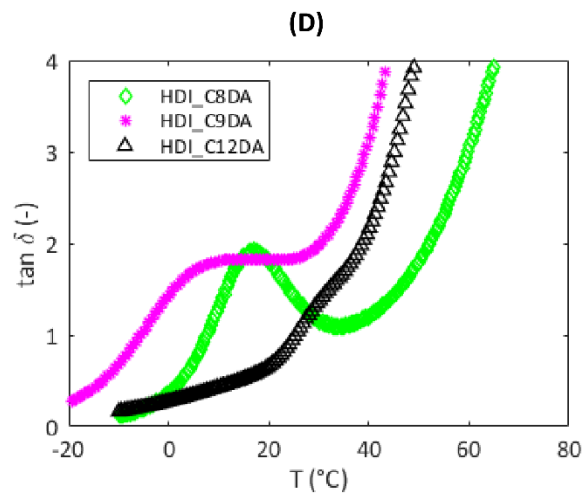

**Figure S7. XRD spectra of HDI\_C8DA at different annealing times.**

The figure shows the evolution of the x-ray diffraction patterns with long-term annealing.

After 7 days at 21 °C, HDI\_C8DA shows some degree of long range order.

**A.** XRD spectrum immediately after high temperature processing

**B.** XRD spectrum recorded after annealing for 7 days at 21 °C

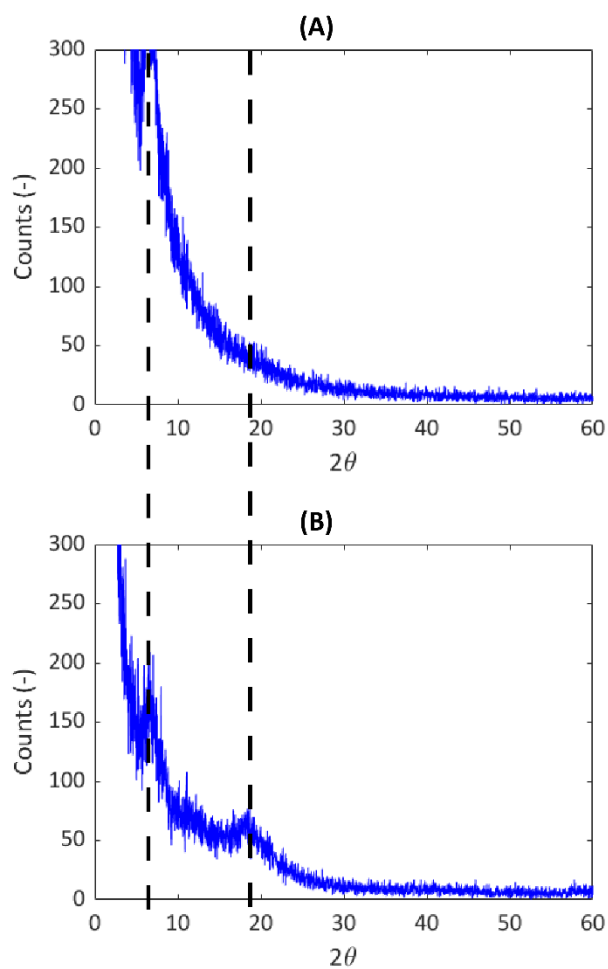

Supplement: ma9b01554_si_001.pdf [file ma9b01554_si_001.pdf]
